# Supplementary material for: Dynamicasome! Comprehensive Mutational Analysis and AI-Driven Prediction of PMM2 Pathogenicity: Integrating Molecular Dynamics Simulations with Machine Learning Models
Source: Research Square preprint supplement (doi:10.21203/rs.3.rs-5538161/v1), 2025-01-24
Supplement: Supplementary file 1 [file a1cbfd1395ba360f24a397ce.pdf]

## Supplemental Figures and Data.

### Schematic S1. Overview of the Gene-to-Protein through Data Harvesting and AI Differentiation.

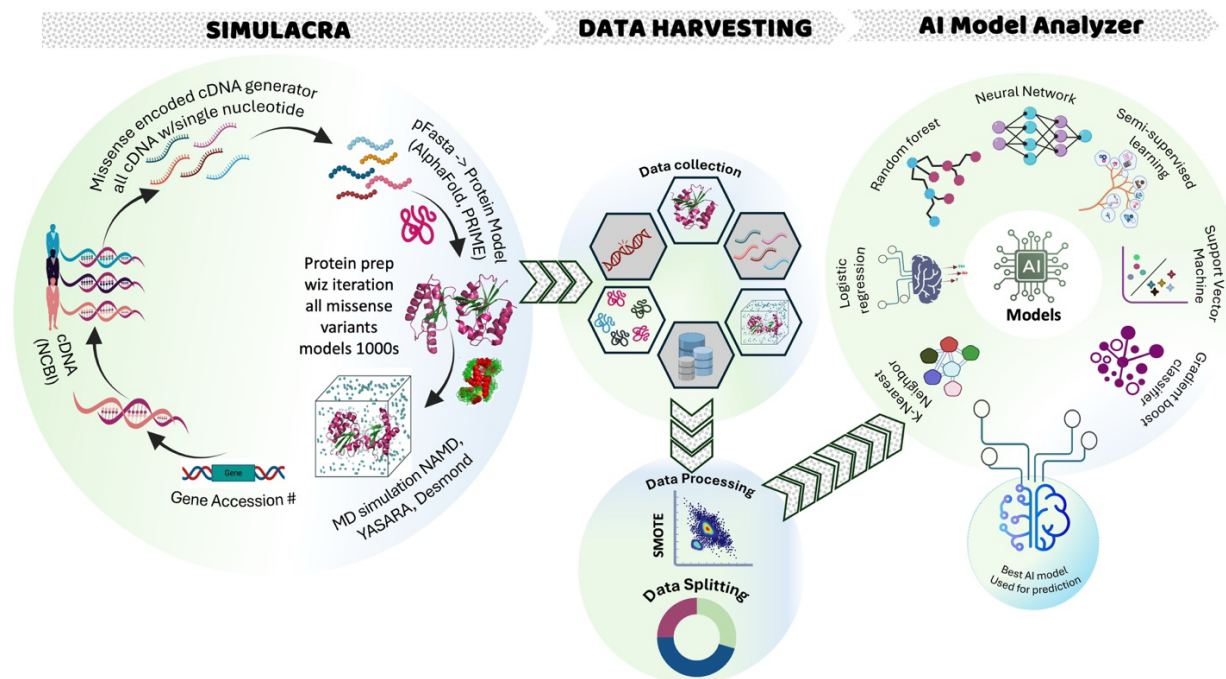

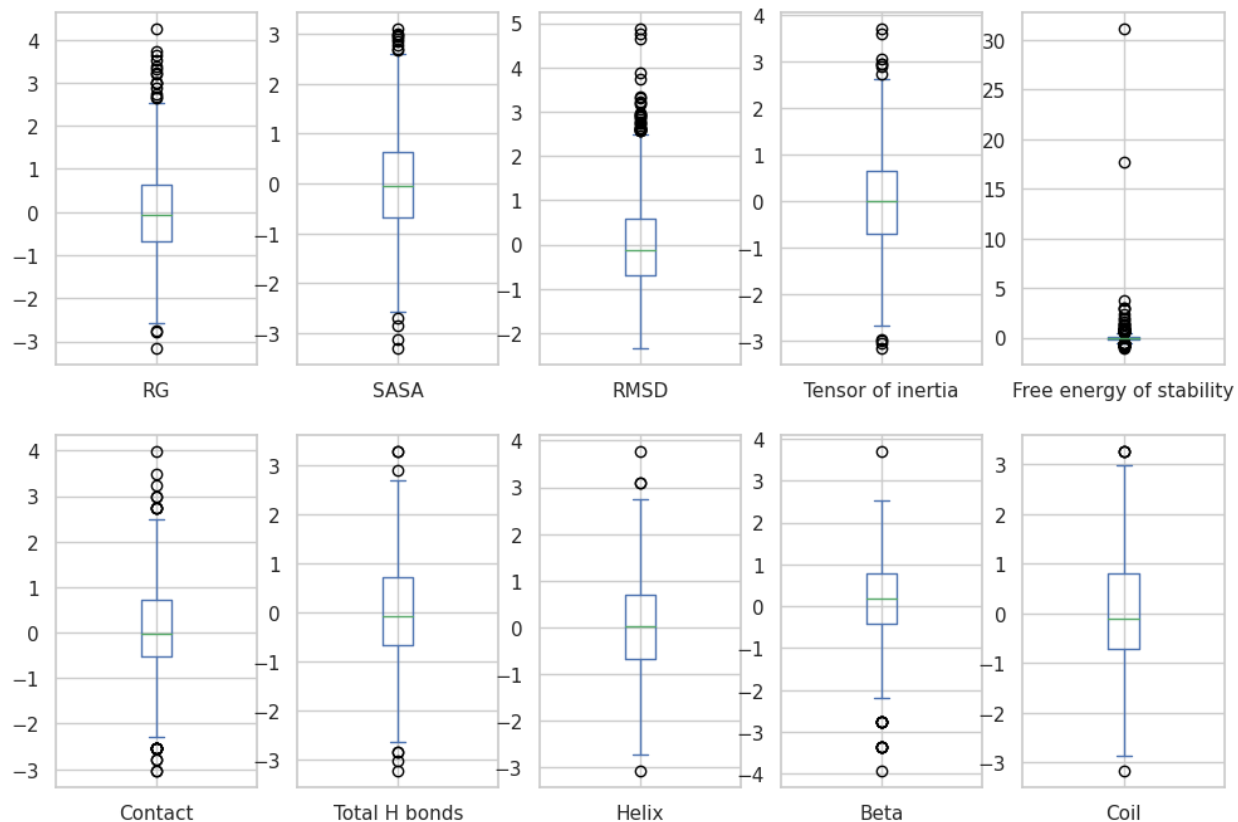

**Fig. S1. MDS-extracted features show varied distributions across PMM2 mutations.** Box plots of the distribution of indicated MDS-extracted features across all PMM2 missense mutations. Each plot depicts the range as a line, the interquartile range as a box, the median as a horizontal line inside the box, and outliers as circles. “Contact” refers to all amino acid contacts; “H bonds” refers to hydrogen bonds; “Helix”, “Beta”, and “Coil” refer to secondary structures.

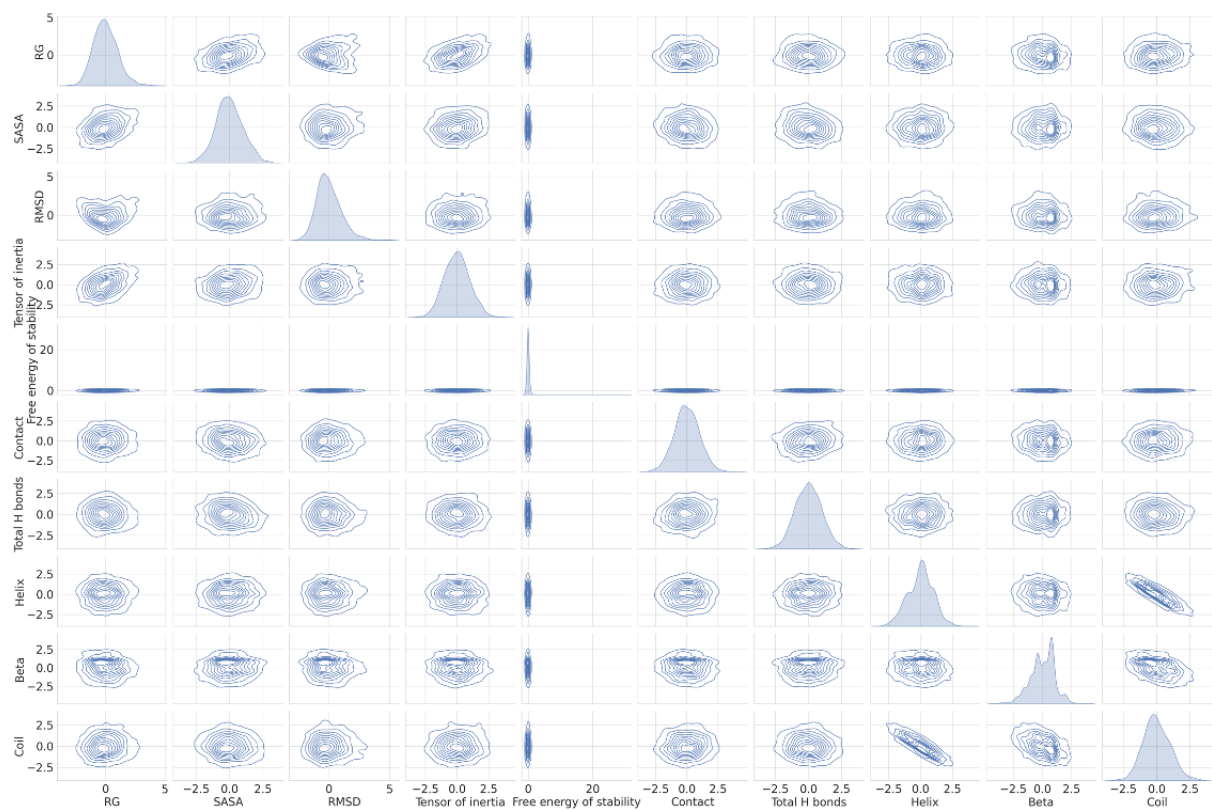

**Fig. S2. Pair plots reveal correlations between MDS-extracted features of PMM2 variants.** Scaled readouts of each feature extracted from MDS of PMM2 variants are plotted against each other to reveal correlations.

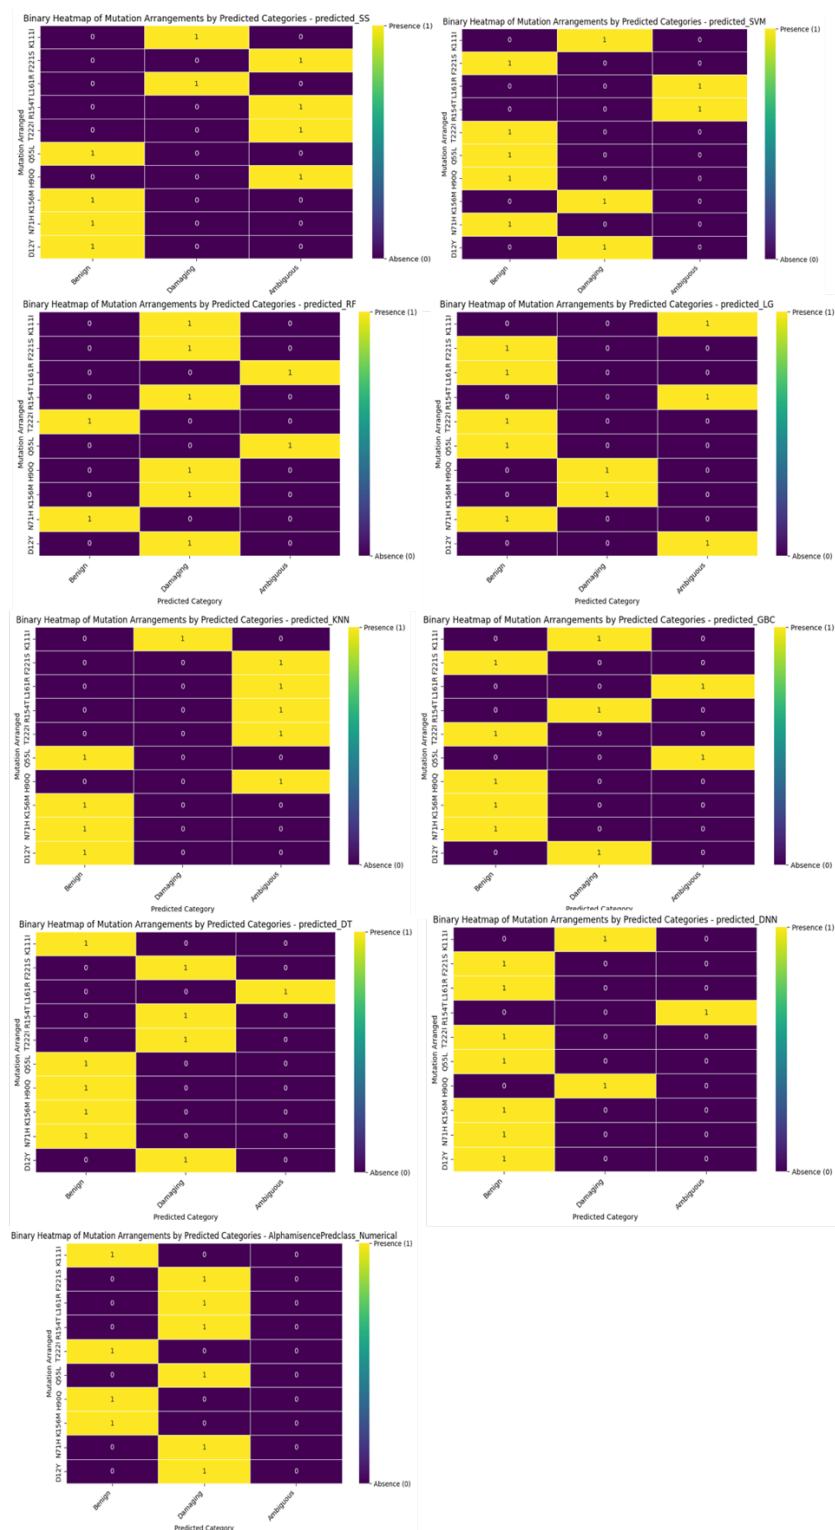

**Fig. S3. Advanced AI models show variations in their predictions for individual PMM2 mutations.** Binary heat maps display how indicated advanced AI models called a subset of PMM2 mutations of unknown significance. Yellow denotes the category called by the model (benign, damaging, or ambiguous), while purple denotes the other two categories not called.

**Table S1. Clinical significance of all labeled PMM2 missense variants in ClinVar.**

| <b>aa in WT PMM2</b> | <b>Residue Number in PMM2</b> | <b>aa post-mutation</b> | <b>ClinVar Classification</b> | <b>Second ClinVar Classification</b> |
|----------------------|-------------------------------|-------------------------|-------------------------------|--------------------------------------|
| C                    | 9                             | F                       | LP                            |                                      |
| C                    | 9                             | Y                       | P                             | LP                                   |
| T                    | 18                            | S                       | P                             | LP                                   |
| R                    | 21                            | G                       | P                             |                                      |
| L                    | 32                            | V                       | LP                            |                                      |
| L                    | 32                            | R                       | P                             |                                      |
| Q                    | 37                            | L                       | B                             | LB                                   |
| V                    | 43                            | M                       | LP                            |                                      |
| V                    | 44                            | A                       | P                             | LP                                   |
| D                    | 65                            | Y                       | P                             |                                      |
| P                    | 69                            | T                       | LP                            |                                      |
| N                    | 101                           | K                       | P                             |                                      |
| L                    | 104                           | V                       | P                             |                                      |
| A                    | 108                           | V                       | P                             | LP                                   |
| P                    | 113                           | L                       | P                             |                                      |
| P                    | 113                           | T                       | LP                            |                                      |
| G                    | 117                           | R                       | LP                            |                                      |
| F                    | 119                           | L                       | P                             |                                      |
| I                    | 120                           | M                       | LP                            |                                      |
| I                    | 120                           | T                       | P                             | LP                                   |
| R                    | 123                           | Q                       | P                             | LP                                   |
| V                    | 129                           | L                       | P                             |                                      |
| V                    | 129                           | M                       | P                             | LP                                   |
| P                    | 131                           | A                       | P                             | LP                                   |
| I                    | 132                           | T                       | P                             |                                      |
| I                    | 132                           | F                       | P                             |                                      |
| E                    | 139                           | K                       | P                             | LP                                   |
| R                    | 141                           | H                       | P                             | LP                                   |
| F                    | 144                           | C                       | LP                            |                                      |
| F                    | 144                           | V                       | LP                            |                                      |
| F                    | 144                           | L                       | P                             | LP                                   |
| D                    | 148                           | N                       | P                             | LP                                   |
| I                    | 153                           | T                       | P                             | LP                                   |
| F                    | 157                           | C                       | LP                            |                                      |

|   |     |   |    |    |
|---|-----|---|----|----|
| F | 157 | S | P  | LP |
| R | 162 | P | LP |    |
| R | 162 | W | P  | LP |
| G | 176 | V | LP |    |
| G | 176 | S | LP |    |
| F | 183 | S | P  |    |
| G | 186 | R | P  |    |
| D | 188 | E | LP |    |
| D | 188 | G | P  | LP |
| D | 188 | Y | LP |    |
| H | 195 | R | LP |    |
| E | 197 | A | B  | LB |
| F | 207 | S | P  | LP |
| G | 208 | A | P  | LP |
| N | 216 | I | P  | LP |
| H | 218 | D | LP |    |
| D | 223 | E | P  |    |
| D | 223 | N | P  |    |
| T | 226 | S | P  | LP |
| G | 228 | C | P  | LP |
| V | 231 | M | P  |    |
| T | 237 | M | P  | LP |
| T | 237 | R | P  | LP |
| R | 238 | P | P  | LP |
| R | 239 | S | LP |    |
| R | 239 | W | P  |    |
| C | 241 | W | LP |    |
| C | 241 | S | P  |    |

aa: amino acid; P: pathogenic; LP: likely pathogenic; LB: likely benign; B: benign. Note: some mutations were submitted to ClinVar multiple times, leading to a second classification of pathogenicity in some instances. If these classifications conflicted, the mutation was considered of uncertain significance. Mutations labeled as uncertain were omitted from this table.

**Table S2. Allele frequency, heterozygosity, and ClinVar clinical significance of PMM2 variants in gnomAD deemed benign by our evaluation.**

| aa in WT PMM2 | Residue Number in PMM2 | aa Post-mutation | ClinVar Classification | Second ClinVar Classification | Allele Frequency | Number of Homozygotes in gnomAD |
|---------------|------------------------|------------------|------------------------|-------------------------------|------------------|---------------------------------|
| E             | 197                    | A                | B                      | LB                            | 0.023            | 535                             |
| Q             | 37                     | L                | B                      | LB                            | 0.000549         | 16                              |
| A             | 228                    | V                | LB                     |                               | 0.000902         | 8                               |
| D             | 30                     | E                | VUS                    |                               | 0.00038          | 8                               |
| R             | 238                    | C                | VUS                    |                               | 0.000556         | 8                               |
| M             | 212                    | V                | VUS                    |                               | 0.000473         | 4                               |
| M             | 227                    | T                | VUS                    |                               | 0.0000116        | 2                               |
| V             | 196                    | M                | VUS                    |                               | 0.0000279        | 1                               |
| E             | 219                    | D                | VUS                    |                               | 0.0000756        | 1                               |
| V             | 182                    | I                | -                      |                               | 0.0000116        | 1                               |
| H             | 221                    | Q                | -                      |                               | 0.0000716        | 1                               |

aa: amino acid; LB: likely benign; B: benign; VUS: variant of unknown significance.

**Table S3. Performance comparison of various machine learning models in multi calss mutation prediction, evaluated using F1 score, precision, and recall.** RF and SSL exhibit strong, balanced performance, while LR and KNN show weaker results. Benchmark models REVEL, PROVEN, and Alphamissence are also included for comparison.

| Models        | F1 Score | Precision | Recall |
|---------------|----------|-----------|--------|
| DT            | 0.655    | 0.655     | 0.661  |
| GBC           | 0.778    | 0.778     | 0.779  |
| KNN           | 0.629    | 0.713     | 0.661  |
| LR            | 0.413    | 0.396     | 0.423  |
| RF            | 0.804    | 0.841     | 0.813  |
| SSL           | 0.803    | 0.813     | 0.836  |
| SVM           | 0.700    | 0.712     | 0.711  |
| DNN           | 0.774    | 0.801     | 0.779  |
| AlphaMissense | 0.682    | 0.660     | 0.793  |

|        |       |       |       |
|--------|-------|-------|-------|
| PROVEN | 0.769 | 0.773 | 0.754 |
| REVEL  | 0.853 | 0.869 | 0.861 |
